# Supplementary material
Source: Springer Nature journal article supplement (https://www.springermedizin.de/resource/supplementary/12958_2011_1018_MOESM7_ESM.pdf/9566598)

Fig. 7

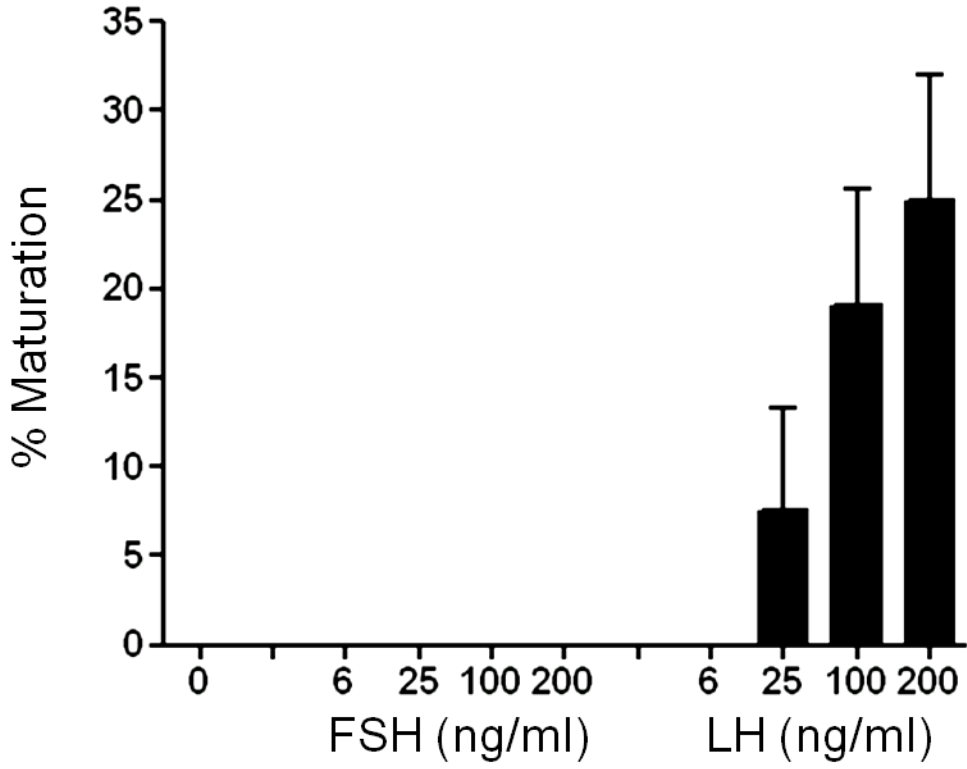

Supplement: MOESM7 [file 9566598]
